# Supplementary material for: Past and future response of the North Atlantic warming hole to anthropogenic forcings
Source: Copernicus journal article supplement (doi:10.5194/esd-2022-40), 2022-09-08
Supplement: Supplementary file [file esd-2022-40-AC2-supplement.pdf]

## Response to Referee #2

### Overall quality/General comments

The paper assess the SST response in the subpolar gyre region (the region is also known as warming hole) to different forcing and reduces the uncertainties in these responses using a kriging method. While I am not an expert in the statistics (maybe this should be looked at by another reviewer?), the method seems both appropriate and valid to me. It is not that easy to understand though, and I believe the paper would benefit from some clarifications (see specific comments). The method is furthermore used to reduce the uncertainty range of the future WH SST evolution and it is tested whether the results appear valid and indeed add an extra value to what was known before.

The paper does not look at the actual processes causing the different responses, but neither does it claim to do so, therefore, I think that is all right. It does however mean, that the informative value of the paper is not overly large, yet as the WH is a much discussed phenomena I still believe that the findings are valuable to the scientific community. Therefore, I would recommend publication once the comments listed below have been fully addressed.

[Thank you for these remarks.](#)

### Specific comments

General: Regarding the method I am not sure why the author is assessing the responses to different forcing when assessing regional SST but not when looking at global GSAT? I see that he is mainly interested in the WH but then why consider GSAT at all (okay, I see the latter is explained in the text)? Plus I wonder whether it can be a problem that air temperature and sea surface temperatures are put into one vector (as they have slightly different variability)?

[Regarding the second question \(I suppose that the first question is no longer relevant given the remark in brackets\), it is not a problem to have these two variables in the same vector, because the covariance between the two is taken into account in the Sigma\\_x \(for CMIP6 models\) and Sigma\\_y \(for observations\) matrices used for the attribution and observational constraint calculations.](#)

L 15 ff Drijfhout et al., 2012 did not compare the 1901-2021 period to the 1870-1900 period, please cite a different source

[I have changed the reference.](#)

LI 16-19 While the modifications in meridional heat transport are linked to the AMOC, the melting of ice has (so far) not been shown to have affected the AMOC, please rephrase

[Done.](#)

L 40 Kriging for Climate Change = KCC method? Please introduce abbreviation that is used later

I have added the acronym.

L 55 ff How many ensemble members are in the DAMIP ensemble and what models have been used? Please provide more information and state why you think that there are enough models/members in there to provide an adequate estimate of the response to the individual forcing (as I thought the DAMIP ensemble is rather small...)

The list of models is provided in Table A1. Regarding the sensitivity of the estimate of the response to different forcings, the DAMIP ensemble may indeed seem small (106 members for 12 models), so I also used the available CMIP6 models (27 models, 249 members) to make the estimate of the GHG response using the 1%CO<sub>2</sub> simulations to reconstruct a hist-GHG equivalent for each CMIP6 model (following Ribes et al 2020). The estimates made with this larger ensemble are consistent with those calculated from the DAMIP ensemble only (Figure 2 vs. Figure S9). I have added this clarification in the manuscript.

LI 69 I am not sure what you mean when you say The sample of the forced responses... do you mean a sample or do you mean the mean/average? Please elaborate

Here, the sample refers to the probability distribution built from the CMIP6 models.

LI 76 ff Can you explain why you expect that some parts of x are not observed in y? I would assume the full forced time series should be a part of y and if you can not observe it in y then because it is "cancelled out" by epsilon. But it seems I don't fully understand the method.

x contains the forced response from 1850 to 2100 ( $n_x = 251$ ) and y contains observations from 1850 to 2021 ( $n_y = 172$ ). epsilon is an estimate of internal variability over 1850-2021. The operator H is an observation operator of size  $n_y \times n_x$ , which extracts the part of x that matches y, i.e., the forced response from 1850 to 2021. This is detailed in Appendix B.

L 79 Why is this remarkable? Please elaborate or leave this sentence out.

I have deleted this sentence.

LI 101 ff Is it correct that you assume that the CMIP6 mean response = the forced response (aka you cannot calculate the mean of the forced responses as you identify the forced response as the mean)? If yes, then how do you determine the covariance of the forced response? If not, please explain how you mean this.

For each CMIP6 model considered, I estimate the forced response in each of the "T" vectors shown in Eq (2). So, I estimate the forced response in GSAT, in mean SST over the warming hole, and also the response to specific forcings (i.e., NAT-only or GHG-only). I use all available members to make this calculation. As a result, I have a sample of 27 estimates of x -- 1 for each CMIP6 model considered.

Then, I compute the sample mean and variance over this sample of 27 vectors. These are our estimates for  $\mu_x$  and  $\Sigma_x$ .

This is detailed in Appendix C.

LI 112-113 Why do you not use such a more complex hierarchical model? Do you believe that it is not necessary in this case?

I have removed this sentence as it was incorrect. The uncertainty is indeed included in the observations (200 members for HadCRUT5 and HadSST4). Sorry for this mistake.

L 121 Could you give 2-3 of those studies as a reference?

Done.

Fig. 1 Is there any reason why you only go until 2014 here, whereas later you consider the period until 2020? It would be nice if these were the same.

Unfortunately, DAMIP simulations only cover the 1850-2014 period (only few modeling centers have extended their simulations to 2020). These are shown in Fig.1. I have used a technique that uses the 1%CO<sub>2</sub> simulations to extend several hist-GHG simulations to 2020, but it is only applicable for times series. Note that the NAT and OA estimates in Fig. 2 are not based on DAMIP simulations, so it is possible to consider the whole observed period until 2020.

Fig. 2 It would be good to mention in the caption that this refers to SST in the WH (not GSAT)

Done.

LI 140 ff I am a little confused how the uncertainties in the responses to the ANT forcing can be so much smaller than those to the GHG and OA forcing even though the former consists of the latter (Fig.2)

This is due to the fact the estimate of the OA response is the result from the ALL - GHG difference. The ALL and GHG responses are derived from the historical and hist-GHG simulations, respectively. Therefore, if there is a large uncertainty for the GHG estimate, there is also one for the OA response by construction. I have mentioned this in the description of the results.

L 174 I would remove slightly since whether >1 degree can be called slightly is debatable

Done.

L 191 Sorry, but what is the confusion matrix and why can you use it here?

The confusion matrix aims to quantify the coverage probabilities, derived from the number of cases for which the true value (from the pseudo-obs) :

- is included in both the constrained range  $p(x|y)$  and the unconstrained range  $\Pi(x)$  (true positive rate),
- not included in both the constrained and unconstrained ranges (true negative rate),
- is included in the constrained range, but not in the unconstrained range (false positive rate)

- is included in the unconstrained range, but not in the constrained range (false negative rate).

I have added this explanation in the manuscript.

LI 1922 But shouldn't this be the case in 90% of the cases, since you are considering the 5-95% interval?

If the method was perfect, I should indeed have a rate of 90%. The reasons I give in the manuscript (the differences in sensitivity between the pseudo-obs and the rest of the models) could explain the difference between the rates I get (around 84%) and the target of 90%.

Technical corrections

Title forcing instead of forcings

L 143 Fig. 1d (not de)

L 166 verb missing in sentence

Done.
